# Variability and Impact of Musculoskeletal Modeling Parameters for the Human Elbow

Russell Hardesty<sup>1,2</sup>, Byeongchan Jeong<sup>1,3</sup>, and Darren E. Gemoets<sup>2</sup>

<sup>1</sup>National Center for Adaptive Neurotechnologies

<sup>2</sup>Department of Veterans Affairs, Stratton Medical Center, Albany, NY

<sup>3</sup>Purdue University

Corresponding author:

Russell Hardesty<sup>1,2</sup>

Email address: [hardesty@neurotechcenter.org](mailto:hardesty@neurotechcenter.org)

## ABSTRACT

Musculoskeletal modeling has significant potential as a translational and clinical research tool for examining neuromuscular injuries and disorders. However its adoption has been limited due, in part, to the difficulty of measuring the subject-specific physiological measures that define model parameters. These measurements may require substantial time and expensive methods, such as MRI, to determine the parameters of a model and thus ensure its accuracy. We used a Monte Carlo simulation to examine the impact of parameter variability on the ill-defined, inverse approximation of muscle activity. We first amalgamated previously published measurements of the physiological characteristics of the upper/lower arm and the biceps/triceps muscles. We then used the observed distributions of these measurements to set physiologically plausible boundaries on uniform distributions and then generated perturbed parameter sets. We computed the root mean squared error (RMSE) between muscle activity patterns generated by the perturbed model parameters to those generated by the original parameters. Regression models were fit to the RMSE of the approximated muscle activity patterns to determine the sensitivity of the simulation results to variation in each parameter. We found that variation in parameters associated with muscle physiology had the most effect on RMSE, suggesting that these parameters may require subject-specific scaling, whereas parameters associated with skeletal bodies had less effect, and might be safely approximated by their population means.

## INTRODUCTION

Musculoskeletal (MS) modeling is a useful, and increasingly popular, tool for studying the underlying dynamics of movement (Hicks et al., 2015). MS models provide mathematical approximations of the body's mechanics to relate activity of the nervous system, i.e., the controller, to the behavior of the musculoskeletal system, i.e., the plant. These models have been used to investigate injury prevention/treatment (Marra et al., 2015), design prostheses/orthoses (Sartori et al., 2018), and infer motor control strategies (Al Borno et al., 2020).

The accuracy of these model approximations is dependent, at least in part, on the accuracy and precision of the parameters which describe the model components. For body segments, these parameters include physiological measures such as center-of-mass and inertia; for muscles, they include muscle lengths, pennation angles, etc. The emergence of accessible and standardized platforms, such as OpenSim and MuJoCo, have facilitated the development and dissemination of increasingly complex models, i.e. larger numbers of components and thus parameters. Parameter value selection is commonly addressed by: 1) averaging anthropometric measurements to create a generic model; 2) linear scaling of parameters to subject dimensions; or 3) by creating subject-specific models. Generic models do not account for the inherent inter-subject variability in these parameters, and scaling of these parameters has limited accuracy (Correa et al., 2011; Scheys et al., 2008). Because of these limitations, subject-specific models have been suggested as the preferred approach. However, subject-specific models have their own limitations. For example, some parameters may be difficult, time-consuming, or expensive to approximate and/or measure, such as those requiring MRI imaging. Furthermore, certain applications may benefit from a

47 more generalizable biomechanical description, e.g. biomimetic controllers for prosthetics (Sartori et al.,  
48 2018). Therefore, better understanding of both the inherent biological variability of these parameters  
49 and their relative contribution in MS simulations is needed to improve modeling assumptions and model  
50 design.

51 Previous studies have attempted to address the impact of parameter uncertainty on simulation outcomes.  
52 Many have focused on evaluating the reliability of subject-specific parameters and have generally found  
53 them to be robust to measurement errors (Myers et al., 2015; Valente et al., 2014; Hannah et al., 2017).  
54 Thus, subject-specific models are generally the preferred approach. Conversely, studies that have evaluated  
55 generic or scaled models have shown them to be less reliable (Correa et al., 2011; Nolte et al., 2016;  
56 Scheys et al., 2008). However generic models, if generalizable, have several advantages. First, they do not  
57 require costly and time-consuming measurements of each subject. Second, they provide a practicable tool  
58 for designing human-interface devices that target a diverse population. Third, generic models may capture  
59 meaningful relationships that do not greatly vary across individuals (Gritsenko et al., 2016; Hardesty  
60 et al., 2020). Furthermore, parameter variability is not entirely unconstrained. The physiological measures  
61 that these parameters represent may be co-dependent, e.g., segment mass and inertia. Or they may be  
62 irrelevant, i.e., they do not significantly influence simulation results. These factors can decrease the  
63 number of subject-specific parameters that must be measured. In fact, in at least one study, anatomical  
64 variability was found to follow multimodal distributions, suggesting that inter-subject variability could be  
65 taken into account by using a finite set of models (Santos and Valero-Cuevas, 2006). Constraining the  
66 biologically plausible parameter space could enable robust model development while limiting the time  
67 and cost associated with creating subject-specific models.

68 Here, we investigate the impact of variability in musculoskeletal parameters relevant to modeling  
69 motion about the elbow joint. We ask three questions: First, what is the inherent variability of each of  
70 these parameters? Second, do any of these parameters correlated with one another such that a subset  
71 of parameters could accurately predict all of them? Third, for which parameters does their variability  
72 have the greatest effect on the outcome of musculoskeletal simulations? To answer these questions, we  
73 amalgamated anthropometric measurements from previously published studies to create a database of  
74 parameters for the upper and lower arms and the biceps and triceps muscle. We then determined the  
75 variability of these parameters and their interdependence. Finally, beginning with the observed parameter  
76 distributions, we use a Monte Carlo simulation and multiple regression models to determine the sensitivity  
77 of inverse simulations to the variability in each of these parameters.

## 78 **METHODS**

### 79 **Musculoskeletal Model**

80 We created a 1 degree-of-freedom (DOF) model of the elbow joint using the OpenSim v4.3 muscu-  
81 loskeletal modeling software (<https://simtk.org/projects/opensim>). The model comprises two rigid bodies  
82 representing the upper and lower arm joined by a single revolute joint representing the elbow. The initial  
83 parameter quantities, kinematic descriptions of the elbow joint, and muscle geometry were adapted from  
84 the MOBL-ARMS Dynamic Upper Limb (Saul et al., 2015a; McFarland et al., 2019). Muscle geometry  
85 definitions were updated to reference this two-body system such that the muscle lengths, tendon lengths,  
86 and muscle moment arms were consistent with the MOBL arm across the full range of motion of the  
87 simplified model (see Figure 1). The model was created using custom Python code (v3.8) (Van Rossum  
88 and Drake Jr, 1995) and the OpenSim API (Delp et al., 2007; Seth et al., 2018).

### 89 **Data Collection**

90 To approximate the inherent biological variability of model parameters, we reviewed anthropometric  
91 publications on the upper arm and forearm to extract measurements of physiological characteristics  
92 used in musculoskeletal model parameters. We defined a global Cartesian coordinate system where  
93 the x-direction was along the posterior-anterior axis, the y-direction along the superior-inferior axis,  
94 and the z-direction along the lateral-distal axis, as shown in Figure 2. Local coordinates for the upper  
95 arm and forearm were defined with origins at the center of the shoulder and elbow joints respectively.  
96 The coordinates were defined such that during neutral posture, the arm was orthogonal to the ground  
97 and all local coordinates were equal to 0. Published parameters that were defined relative to differing  
98 coordinate systems were transformed so that all values were relative to this predefined coordinate  
99 system. Reported measurements were coalesced into an SQL database to perform statistical analysis

100 and subsequent computational simulations. This database and the relevant Python code are available at  
101 [https://github.com/NeuroEng/ms\\_db-git](https://github.com/NeuroEng/ms_db-git).

### 102 **Biological variability**

103 To determine the inherent parameter variability, we calculated summary statistics including the mean,  
104 standard deviation, median, interquartile range, coefficient of variations, and confidence intervals for  
105 each parameter in the amalgamated dataset. These summary statistics were then used to constrain our  
106 coefficient exploration (see Computational Simulations). We then performed a linear regression between  
107 parameters that are likely to be interdependent, e.g. mass vs. inertia for bodies and muscles and calculated  
108 the correlation coefficient. This determined whether all parameters could be accurately predicted from a  
109 subset of parameters. R (R Core Team, 2020) or Python (Van Rossum and Drake Jr, 1995) were used for  
110 the sensitivity analyses and all statistical analyses.

### 111 **Computational Simulations**

112 We chose to evaluate the sensitivity of musculoskeletal parameters in inverse simulations of the muscle  
113 activity that produces a predefined desired movement. Inverse musculoskeletal simulations are ill-defined,  
114 i.e., they may be satisfied with multiple solutions, a feature of musculoskeletal physiology termed "motor  
115 redundancy." When there is no explicit solution, this problem can be addressed by various optimization  
116 methods. Because this problem is ill-defined, we found that these optimization procedures would be  
117 particularly susceptible to variability in model parameters. We used OpenSim's computed muscle control  
118 (CMC) optimization procedure to calculate muscle activity patterns capable of generating a sigmoidal  
119 flexion of the elbow joint. The CMC procedure combines proportional-derivative control with a static  
120 optimization to optimize muscle activity over a designated time window (10ms) while minimizing total  
121 activation ( $a$ )

$$122 \quad \operatorname{argmin} \bar{a}^2.$$

123 The feedback gain was 100 for position error ( $K_p$ ) and 20 for velocity error ( $K_v$ ). A more thorough  
124 description of the CMC procedure can be found in (Thelen and Anderson, 2006). The desired movement  
125 was a physiologically-realistic sigmoidal flexion of the elbow joint from 0 to 120 degrees over 1 sec with  
126 a 0.5 sec hold both before and after the movement to ensure that the simulations achieved equilibrium.

127 To evaluate parameter sensitivity, we performed a Monte Carlo procedure where each parameter was  
128 randomly assigned from a uniform distribution bounded by the 95% confidence interval for the mean  
129 calculated from the amalgamated literature values. The CMC optimization was repeated for each set of  
130 parameter values, as shown in Figure 3, and the resultant muscle activation profiles were compared with  
131 results obtained the unperturbed parameter values used in the MOBL model. The root-mean-square error  
132 (RMSE) between the original and perturbed muscle activities was calculated.

### 133 **Sensitivity Analysis**

134 We used multiple linear regression models to assess the impact of each parameter on the simulation  
135 results. The data were standardized (i.e., each variable was centered on its mean and scaled by its standard  
136 deviation). Next, a least squares multiple regression model was fit to the standardized data with the RMSE  
137 values as the response variable and the sampled MS parameter values as the predictor variables (see,  
138 for example, Saltelli et al. (2008) for more details). This standardization allowed for across-parameter  
139 comparisons, and each regression parameter estimate can be interpreted as standardized change in RMSE  
140 per standardized change in MS parameter. Main effects models are reported in the Results section. Models  
141 with two-way interactions – which explore the joint effect of parameters on RMSE – are reported in the  
142 Supplemental materials.

## 143 **RESULTS**

### 144 **Parameter Variability**

145 We first assessed the distribution of musculoskeletal modeling parameters as reported in the literature  
146 (see Figures 4 and 5). We calculated the mean, standard deviation, median, interquartile range (IQR), the  
147 coefficient of variation, and 95% confidence intervals for each parameter. These summary statistics for  
148 the upper arm, forearm, biceps, and triceps are shown in tables 5, 6, 7, and 8, respectively. Amongst body

149 parameters, the center-of-mass, in the x (anterior-posterior) and in the z (medial-lateral) direction were the  
150 most variable, as shown by their coefficients of variation (center-of-mass (x): 3.1 and -1.7; center-of-mass  
151 (z): -2.2 and 10.7 for the upper and lower arm, respectively). In contrast, muscle parameters all had  
152 coefficients of variation less than 1 (range: 0.12 - 0.49) demonstrating that muscle parameter magnitudes  
153 are less variable relative to their mean value.

### 154 **Parameter Correlation**

155 Next, we calculated the Pearson's correlation coefficient ( $r$ ) and the variance explained ( $r^2$ ) to determine  
156 whether parameter values may be approximated from a subset of measured values (see Figure 6). Body  
157 parameters showed weak to moderate correlations with one another ( $r^2$  range: 0.000317 - 0.521486).  
158 The strongest correlation was between inertia (Ixx) and mass and center-of-mass in the y-direction. The  
159 center-of-mass in the x- and z-directions, which were the most variable parameters in our data set, were  
160 only weakly correlated with other body parameters. The largest  $r^2$  for center-of-mass in the x-direction  
161 was 0.04 and the largest in the z-direction was 0.25. Muscle parameters also showed weak correlations,  
162 with two exceptions: (1) maximum isometric force and pennation angle ( $r^2$  : 0.69) and (2) maximum  
163 isometric force and optimal fiber length ( $r^2$  : 0.88). Overall, these results suggest that body parameters,  
164 particularly center-of-mass in the x- and z-directions are not only more variable, but cannot be accurately  
165 approximated from linear regression with other body parameter values.

### 166 **Simulation Results**

167 The CMC optimization successfully computed muscle activations for 990 of the 1000 simulations. For 10  
168 simulations, the optimization was unable to find an acceptable muscle activity profile within the integrator  
169 tolerance (0.00001). The desired elbow angle is show in Figure 7A; the movement began with the elbow  
170 extended at an angle of 0 radians. The muscle activity profiles for individual simulations are shown as  
171 black lines in Figure 7B and C. The mean activity and standard deviation across simulations are shown  
172 as solid lines and shaded regions, respectively. As expected, the triceps is activated at the beginning of  
173 the simulation; it maintains the elbow in an extended posture prior to movement onset. Once movement  
174 begins, triceps activity generally decreases and the biceps activity begins to increase to flex the elbow  
175 joint. While this behavior was relatively consistent across the majority of simulations, the timing and  
176 extent of triceps deactivation and biceps activation differed depending upon the perturbed parameters.  
177 Interestingly, the triceps error varied to a larger extent than that of the biceps (see Figure 8). Because the  
178 triceps activity was generally larger than that of the biceps, we computed the coefficients of variation for  
179 triceps and biceps error to normalize this error to the magnitude. Even after this normalization triceps  
180 profiles varied more than biceps profiles (triceps CV: 0.86; biceps CV: 0.35).

### 181 **Sensitivity Analysis**

182 We performed a multiple linear regression of parameter magnitudes to RMSE of both triceps and biceps.  
183 RMSE is calculated between the muscle activity patterns generated from our default parameter values  
184 and the muscle activity patterns generated from the perturbed parameters in our Monte Carlo simulation.  
185 Table 9 shows the largest regression parameter estimates (in magnitude) with the RMSE for the biceps as  
186 the response, with  $r^2 = 0.70$  for this model. Note that positive regression parameters increase RMSE, and  
187 because the data are standardized the estimates are comparable. Tendon length and optimal fiber length  
188 for both the biceps and triceps have the largest impact in RMSE, along with the biceps maximum force.  
189 We expect some false-positive results may occur and suspect that this may be the case for the triceps  
190 pennation angle and lower-arm COM (y-direction), as their estimates are the lowest amongst significant  
191 parameters. It should be noted that our simulations had 66 duplicate biceps error values. Because this was  
192 a small fraction of the total number of simulations ( $n = 1000$ ), we believe that these duplicates may be the  
193 result of: 1) sensitive parameters having similar values in this small subset of simulations; 2) a floor effect  
194 due to the fact that movement was being generated entirely by passive forces; and/or 3) limited numerical  
195 precision. Table 10 shows the largest regression parameter estimates with the RMSE for the triceps as  
196 the response (with  $r^2 = 0.65$ ). Similar to our regression results using the biceps RMSE as the response,  
197 the largest regression parameter estimates were for muscle parameters. The largest estimates being the  
198 optimal length of the biceps and the tendon slack length of both muscles. There were more repeated error  
199 values for the triceps ( $n = 170$ ). Because these were present in a minority of simulations, we included all  
200 values in the regression model.

## 201 **DISCUSSION**

202 The goal of this study was to evaluate the inherent variability in physiological measures used in muscu-  
203 loskeletal models of the human elbow and to determine the sensitivity of inverse dynamics optimizations to  
204 these parameters' variability. Several other studies have evaluated parameter sensitivity in musculoskeletal  
205 models, but these have focused primarily on the lower extremity (Hamed et al., 2022; Hannah et al., 2017;  
206 Pal et al., 2007; Bujalski et al., 2018) and/or on variability introduced by measurement error (Myers  
207 et al., 2015). In contrast, the present study sought to determine: (1) the inherent variability of parameters  
208 used in modeling the elbow joint; (2) whether these parameters correlated to one another such that a  
209 subset of parameters could adequately predict other parameters; and (3) the parameters for which their  
210 variability has the most impact on musculoskeletal simulations (i.e., the parameters to which simulations  
211 are most sensitive). Our results indicate that although poorly correlated to one another, body parameters  
212 have greater relative variability than muscle parameters. However, it is muscle parameters that most  
213 influence inverse simulation results, meaning that even small errors in their approximation could have an  
214 outsized impact. These findings have implications for subject-specific modeling and for evaluating model  
215 robustness and accuracy. Both will be discussed below. Furthermore, there are several limitations to our  
216 study which should be acknowledged and will also be discussed.

### 217 **Subject-specific Modeling**

218 Subject-specific models refer to models in which the parameter values are chosen to closely match  
219 measurements obtained from the individual of interest. This approach is preferred because it accounts for  
220 biological diversity, i.e. the model is customized per individual and measurement errors seem to have  
221 relatively small impact on simulation results (Myers et al., 2015; Valente et al., 2014; Hannah et al., 2017).  
222 However, obtaining these measurements is not practicable in all settings or circumstances. Measurements  
223 of muscle physiology, such as pennation angle or slack lengths require considerably sophisticated imaging  
224 techniques, such as MRI or ultrasound (Carbone et al., 2015; Scott et al., 1993; Parkkola et al., 1993;  
225 Hasson and Caldwell, 2012; Maganaris, 2001; O'Brien et al., 2010). These techniques, in turn, require  
226 appropriate expertise to collect, extract, and quantify these measurements. Therefore, the availability of  
227 the hardware and expertise needed to obtain these measurements limits the use of subject-specific models.  
228 In lieu of subject-specific measurements, parameter values may be estimated but these estimations require,  
229 by necessity, assumptions to be made. For example, parameter values may be linearly scaled to other  
230 anthropometric measurements, such as a segment's length or a person's weight (Winter, 2009). While  
231 these assumptions address the difficulties in creating subject-specific models, they may also introduce  
232 additional sources of error (Nolte et al., 2016). Here, we examined whether a subset of subject-specific  
233 parameters could be used to reasonably approximate other parameters. Unfortunately, we found generally  
234 weak correlations between parameters with two exceptions. Both muscle optimal length and pennation  
235 angle correlated well with the muscle's maximum isometric force; although it is noteworthy that maximum  
236 isometric force had the fewest measurements in our dataset. Overall, our results confirm and expand upon  
237 previous work demonstrating the difficulty in approximating musculoskeletal parameters without direct  
238 measurements.

### 239 **Model Accuracy**

240 The results of our study could be interpreted as evidence that generic or scaled models are insufficient  
241 or inaccurate. However, any criterion of model accuracy must consider the intended application. For  
242 example, some neuromechanical-based prosthetic controllers have exploited musculoskeletal models  
243 whose parameters are linearly scaled and/or empirically determined (Sartori et al., 2018). These models  
244 may not be accurate, in the strictest sense, to a specific individual but they are "good enough" for  
245 their particular application (Hicks et al., 2015). Here, we evaluated the impact of parameter variability  
246 independently of a specific application and found that muscle parameters generally have a larger impact on  
247 the optimized muscle activities generated by inverse simulations. Therefore, while a specific application  
248 will still require its own assessment of model accuracy, our results suggest that muscle parameters should  
249 be prioritized when it is determined that subject-specific parameters are needed.

### 250 **Limitations**

251 Our study has some limitations that should be considered when interpreting or generalizing these results.  
252 First, our reduced elbow model was comprised of two muscle actuators with a single degree of freedom,

253 while the human arm has many more of both. Although this simplified model has motor redundancy (2  
254 control inputs for a single DOF), the larger number of muscle actuators in the human arm increases the  
255 potential solution space further, which may amplify the impact of musculoskeletal parameter variability  
256 on inverse simulation. Second, we constrained our Monte Carlo procedure to resample model parameters  
257 from a uniform distribution constrained by reported anthropometric measurements. These parameters did  
258 not include muscle geometry, which has recently been shown to be a significant source of variability in  
259 simulated ground reaction forces for the lower extremity (Hamed et al., 2022).

## 260 CONCLUSIONS

261 In conclusion, musculoskeletal models have a wide range of potential applications, including performance  
262 assessment, orthosis/prosthesis design, and inferring neural control strategies. Different applications may  
263 have specific requirements on the accuracy of musculoskeletal simulations, i.e., some results may be  
264 “good enough” for one application and insufficient for another (Hicks et al., 2015). Our results may help  
265 inform future model development and applications. Our results demonstrate that models should prioritize  
266 approximating muscle parameters as accurately as possible to minimize simulation error, while body  
267 parameters may be sufficiently represented using mean values. Future work may: (1) investigate the range  
268 of parameter sensitivity to further constrain modeling assumptions; (2) determine whether parameter  
269 sensitivity scales linearly with model complexity; and (3) further disentangle sources of variability.

## 270 AUTHOR CONTRIBUTIONS

271 Conceptualization/Study Design: RH

272 Data Collection: RH, BJ

273 Data Analysis: RH, BJ, DG

274 Writing: RH, DG

## 275 ACKNOWLEDGEMENTS

276 This material is based upon work supported by the Department of Veterans Affairs, Veterans Health  
277 Administration, Office of Research and Development. We are grateful to Drs. Jonathan Wolpaw, Jonathan  
278 Carp, and Valeriya Gritsenko for their constructive feedback on the manuscript. The opinions expressed  
279 in this paper are those of the authors and do not represent the views of the Department of Veterans Affairs  
280 or the US Government.

## 281 FIGURES AND TABLES

| reference                  | mass | com (x) | com (y) | com (z) | Ixx | Iyy | Izz |
|----------------------------|------|---------|---------|---------|-----|-----|-----|
| Chandler et al. (1975)     | 12   | 12      | 12      | 12      | 12  | 12  | 12  |
| Ho et al. (2013)           | -    | -       | -       | -       | 1   | 1   | 1   |
| Jensen (1978)              | 3    | -       | -       | -       | 3   | 3   | 3   |
| McConville et al. (1980)   | -    | 2       | 2       | 2       | 2   | 2   | 2   |
| Nikolova (2010)            | -    | -       | -       | -       | 2   | 2   | 2   |
| Nikolova and Toshev (2007) | 2    | -       | -       | -       | 2   | 2   | 2   |
| Saul et al. (2015b)        | 1    | 1       | 1       | 1       | 1   | 1   | 1   |
| Shan and Bohn (2003)       | -    | -       | -       | -       | 2   | 2   | 2   |
| Veeger et al. (1991)       | 7    | -       | 7       | -       | 7   | -   | 7   |
| Veeger et al. (1997)       | 4    | -       | 4       | -       | 4   | -   | 4   |
| Young et al. (1983)        | -    | 2       | 2       | 2       | 2   | 2   | 2   |

**Table 1.** Number of individual measurements obtained from each reference for the humerus.

| reference                  | mass | com (x) | com (y) | com (z) | Ixx | Iyy | Izz |
|----------------------------|------|---------|---------|---------|-----|-----|-----|
| Chandler et al. (1975)     | 12   | 12      | 12      | 12      | 12  | 12  | 12  |
| Ho et al. (2013)           | -    | -       | -       | -       | 1   | 1   | 1   |
| Jensen (1978)              | 3    | -       | -       | -       | 3   | 3   | 3   |
| Jensen and Fletcher (1993) | -    | -       | -       | -       | 2   | 2   | 2   |
| McConville et al. (1980)   | -    | 2       | 2       | 2       | 2   | 2   | 2   |
| Nikolova (2010)            | -    | -       | -       | -       | 2   | 2   | 2   |
| Nikolova and Toshev (2007) | 2    | -       | -       | -       | 2   | 2   | 2   |
| Shan and Bohn (2003)       | -    | -       | -       | -       | 2   | 2   | 2   |
| Veeger et al. (1991)       | 7    | -       | 7       | -       | 7   | -   | 7   |
| Veeger et al. (1997)       | 4    | -       | 4       | -       | 4   | -   | 4   |
| Young et al. (1983)        | -    | 2       | 2       | 2       | 2   | 2   | 2   |

**Table 2.** Number of individual measurements obtained from each reference for the forearm.

| reference                   | max iso. force | opt. fiber length | tendon slack length | pen. angle |
|-----------------------------|----------------|-------------------|---------------------|------------|
| Amis et al. (1979)          | -              | -                 | -                   | -          |
| An et al. (1981)            | -              | -                 | -                   | -          |
| Garner and Pandy (2001)     | 1              | 1                 | 1                   | 1          |
| Holzbaur et al. (2005)5     | 1              | 1                 | 1                   | -          |
| Koo (2001)                  | -              | 5                 | 5                   | -          |
| Langenderfer et al. (2004a) | -              | 1                 | 1                   | -          |
| Murray et al. (2000)        | -              | 1                 | 1                   | 1          |
| Peterson and Rayan (2011)   | -              | 1                 | -                   | 1          |
| Saul et al. (2015b)         | 2              | 2                 | 2                   | -          |
| Veeger et al. (1997)        | -              | -                 | -                   | 1          |
| Winters and Stark (1988)    | -              | -                 | 1                   | 1          |

**Table 3.** Number of individual measurements obtained from each reference for the biceps muscle.

| reference                   | max iso. force | opt. fiber length | tendon slack length | pen. angle |
|-----------------------------|----------------|-------------------|---------------------|------------|
| Amis et al. (1979)          | -              | -                 | -                   | -          |
| Amis et al. (1979)          | -              | -                 | -                   | -          |
| Garner and Pandy (2001)     | 1              | 1                 | 1                   | 1          |
| Holzbaur et al. (2005)      | 1              | 1                 | 1                   | 1          |
| Koo (2001)                  | -              | 5                 | 5                   | -          |
| Langenderfer et al. (2004b) | -              | 1                 | 1                   | 1          |
| Murray et al. (2000)        | -              | 1                 | 1                   | 1          |
| Peterson and Rayan (2011)   | -              | 1                 | -                   | 1          |
| Saul et al. (2015b)         | 2              | 2                 | 2                   | 2          |
| Veeger et al. (1997)        | -              | -                 | -                   | 1          |
| Winters and Stark (1988)    | -              | -                 | 1                   | 1          |

**Table 4.** Number of individual measurements obtained from each reference for the triceps muscle.

| Parameter          | Mean       | STD        | Median    | IQR        | Coef Variance | 95% CI for Mean       |
|--------------------|------------|------------|-----------|------------|---------------|-----------------------|
| mass               | 1.78867    | 0.407918   | 1.815     | 0.43757    | 0.228056      | 1.632477 - 1.944873   |
| center-of-mass (x) | 0.00336235 | 0.0104634  | 0.005     | 0.0109     | 3.11192       | -0.001938 - 0.008663  |
| center-of-mass (y) | -0.162539  | 0.039635   | -0.15935  | 0.03575    | -0.24385      | -0.177994 - -0.147083 |
| center-of-mass (z) | -0.0105088 | 0.0227707  | -0.008    | 0.0281     | -2.16682      | -0.022043 - 0.001026  |
| inertia (xx)       | 0.0110324  | 0.00530084 | 0.01224   | 0.0069325  | 0.48048       | 0.009267 - 0.012798   |
| inertia (yy)       | 0.00551769 | 0.00599471 | 0.0024785 | 0.00659845 | 1.08645       | 0.003136 - 0.0079     |
| inertia (zz)       | 0.00894227 | 0.00571488 | 0.0095562 | 0.0105385  | 0.639086      | 0.007039 - 0.010846   |

**Table 5.** Summary statistics for body parameters of the upper arm.

| Parameter          | Mean       | STD        | Median  | IQR       | Coef Variance | 95% CI for Mean       |
|--------------------|------------|------------|---------|-----------|---------------|-----------------------|
| mass               | 1.04411    | 0.246109   | 1.05    | 0.2325    | 0.235713      | 0.948224 - 1.13999    |
| center-of-mass (x) | -0.0125437 | 0.0211614  | -0.0049 | 0.039     | -1.68701      | -0.023605 - -0.001483 |
| center-of-mass (y) | -0.101452  | 0.00971194 | -0.1031 | 0.015     | -0.0957295    | -0.105308 - -0.097596 |
| center-of-mass (z) | 0.00216875 | 0.0232715  | 0       | 0.011225  | 10.7304       | -0.009995 - 0.014333  |
| inertia (xx)       | 0.00510016 | 0.00296481 | 0.0054  | 0.004515  | 0.581317      | 0.004127 - 0.006074   |
| inertia (yy)       | 0.00167346 | 0.00166061 | 0.001   | 0.0011675 | 0.99232       | 0.001026 - 0.00232    |
| inertia (zz)       | 0.00395479 | 0.00284997 | 0.0045  | 0.0044335 | 0.720639      | 0.003019 - 0.004891   |

**Table 6.** Summary statistics for body parameters of the forearm.

| Parameter           | Mean     | STD       | Median | IQR      | Coef Variance | 95% CI for Mean         |
|---------------------|----------|-----------|--------|----------|---------------|-------------------------|
| max iso. force      | 516.852  | 82.2234   | 525.1  | 57.8475  | 0.159085      | 414.296121 - 619.408879 |
| opt. length         | 0.12411  | 0.0244155 | 0.116  | 0.027575 | 0.196724      | 0.106528 - 0.141692     |
| tendon slack length | 0.249955 | 0.0308595 | 0.261  | 0.0464   | 0.123461      | 0.228872 - 0.271037     |
| pen. angle          | 11.6667  | 2.35702   | 10     | 2.5      | 0.202031      | 8.066052 - 15.267281    |

**Table 7.** Summary statistics for muscle parameters of the biceps (long head).

| Parameter           | Mean     | STD       | Median | IQR     | Coef Variance | 95% CI for Mean          |
|---------------------|----------|-----------|--------|---------|---------------|--------------------------|
| max iso. force      | 832.043  | 255.056   | 717.5  | 161.142 | 0.306543      | 513.913282 - 1150.171718 |
| opt. length         | 0.10713  | 0.0322784 | 0.1054 | 0.024   | 0.301301      | 0.083886 - 0.130374      |
| tendon slack length | 0.145718 | 0.037968  | 0.167  | 0.0733  | 0.260558      | 0.11978 - 0.171657       |
| pen. angle          | 16.1429  | 7.97189   | 15     | 11.5    | 0.493834      | 9.111915 - 23.173799     |

**Table 8.** Summary statistics for muscle parameters of the triceps (lateral head).



|                               | Estimate | Std. Error | t value | P-value |
|-------------------------------|----------|------------|---------|---------|
| max. force (biceps)           | -0.45    | 0.02       | -25.55  | 0.00    |
| tendon slack length (biceps)  | 0.42     | 0.02       | 23.96   | 0.00    |
| tendon slack length (triceps) | -0.36    | 0.02       | -20.19  | 0.00    |
| opt. length (biceps)          | 0.32     | 0.02       | 17.78   | 0.00    |
| opt. length (triceps)         | -0.21    | 0.02       | -11.55  | 0.00    |
| lower arm mass                | 0.19     | 0.02       | 10.41   | 0.00    |
| max. force (triceps)          | 0.17     | 0.02       | 9.70    | 0.00    |
| lower arm COM (y)             | -0.09    | 0.02       | -5.01   | 0.00    |
| pen. angle (triceps)          | 0.05     | 0.02       | 2.98    | 0.00    |
| lower arm COM (x)             | -0.04    | 0.02       | -2.21   | 0.03    |
| upper arm Iyz                 | 0.04     | 0.02       | 2.10    | 0.04    |
| upper arm COM (z)             | 0.03     | 0.02       | 1.52    | 0.13    |
| upper arm Ixx                 | 0.02     | 0.02       | 1.36    | 0.17    |
| lower arm Izz                 | -0.02    | 0.02       | -1.23   | 0.22    |
| lower arm Iyy                 | 0.02     | 0.02       | 1.13    | 0.26    |
| upper arm Ixy                 | 0.02     | 0.02       | 1.12    | 0.26    |
| lower arm Ixy                 | 0.01     | 0.02       | 0.83    | 0.41    |
| lower arm Ixx                 | 0.01     | 0.02       | 0.66    | 0.51    |
| upper arm COM (x)             | -0.01    | 0.02       | -0.63   | 0.53    |
| lower arm COM (z)             | -0.01    | 0.02       | -0.51   | 0.61    |

**Table 9.** Regression parameter estimates for biceps RMSE, in order of decreasing value (in magnitude).

|                               | Estimate | Std. Error | t value | P-value |
|-------------------------------|----------|------------|---------|---------|
| tendon slack length (triceps) | -0.45    | 0.02       | -23.63  | 0.00    |
| opt. length (biceps)          | -0.44    | 0.02       | -22.93  | 0.00    |
| tendon slack length (biceps)  | -0.39    | 0.02       | -20.30  | 0.00    |
| pen. angle (triceps)          | 0.23     | 0.02       | 11.91   | 0.00    |
| opt. length (triceps)         | -0.09    | 0.02       | -4.52   | 0.00    |
| max. force (biceps)           | 0.09     | 0.02       | 4.51    | 0.00    |
| max. force (triceps)          | -0.05    | 0.02       | -2.44   | 0.01    |
| lower arm COM (z)             | 0.04     | 0.02       | 2.13    | 0.03    |
| upper arm mass                | 0.04     | 0.02       | 1.99    | 0.05    |
| upper arm COM (x)             | 0.04     | 0.02       | 1.90    | 0.06    |
| lower arm COM (x)             | -0.04    | 0.02       | -1.85   | 0.07    |
| lower arm Iyy                 | -0.03    | 0.02       | -1.82   | 0.07    |
| upper arm Iyz                 | -0.03    | 0.02       | -1.74   | 0.08    |
| lower arm Ixz                 | -0.03    | 0.02       | -1.72   | 0.09    |
| lower arm Ixx                 | -0.03    | 0.02       | -1.58   | 0.11    |
| lower arm Ixy                 | -0.03    | 0.02       | -1.51   | 0.13    |
| pen. angle (biceps)           | 0.03     | 0.02       | 1.49    | 0.14    |
| upper arm Ixz                 | -0.03    | 0.02       | -1.45   | 0.15    |
| lower arm Izz                 | 0.02     | 0.02       | 0.87    | 0.39    |
| upper arm Iyy                 | 0.02     | 0.02       | 0.84    | 0.40    |

**Table 10.** Regression parameter estimate for triceps RMSE, in order of decreasing value (in magnitude).

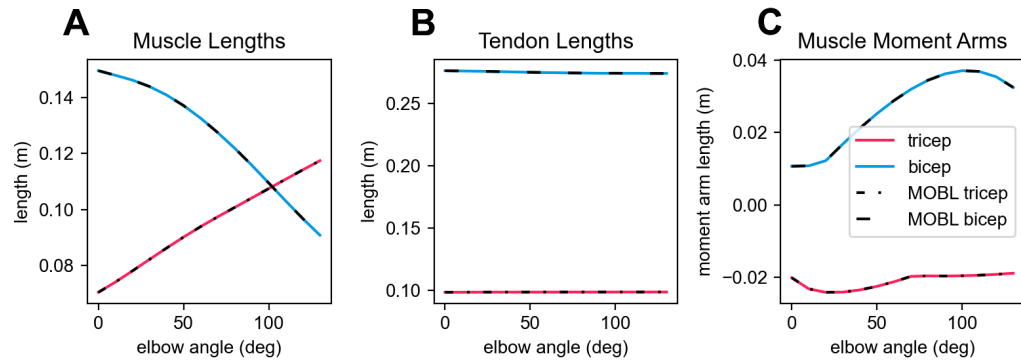

**Figure 1.** Musculoskeletal dynamics of simplified elbow model are consistent with the MOBL Dynamics Arm model. Muscle lengths (A), tendon lengths (B), and muscle moment arms (C) are shown across the full range of the elbow joint.

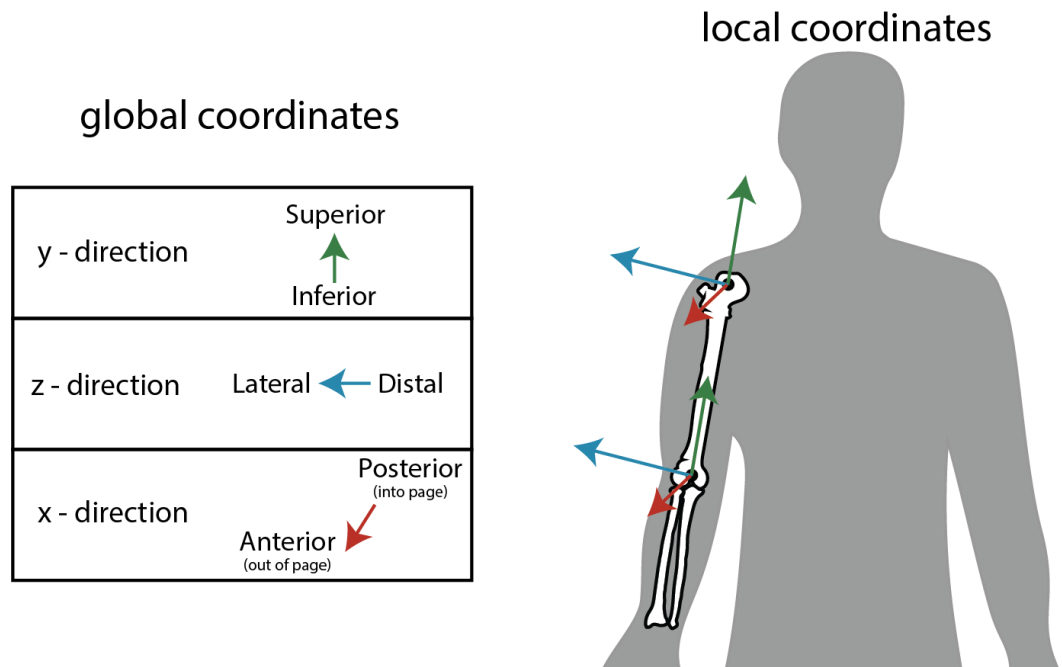

**Figure 2.** The global and local Euler coordinate definitions for all parameter values are shown. The global coordinate was defined such that at neutral posture (all joint angles equal to 0) the arm is parallel to gravity. Local coordinate origins were located in the center of the shoulder and elbow joint.

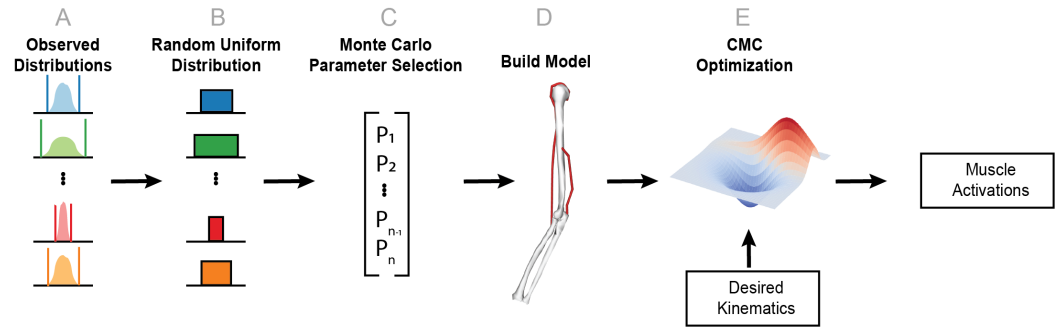

**Figure 3.** A schematic representation of the simulation procedure is shown. This procedure is repeated for each simulation ( $N=1000$ ). Parameter distributions were approximated from an amalgamated data set of previously reported measurements (A). These distributions were then used to create a random uniform distribution constrained by the 95-percentile confidence interval (B). A particular parameter set is generated using a Monte Carlo re-sampling of the uniform distributions (C). An OpenSim model of the elbow is then generated using this parameter set (D). Finally, the CMC optimization is performed using predefined desired kinematics and the newly generated model (E).

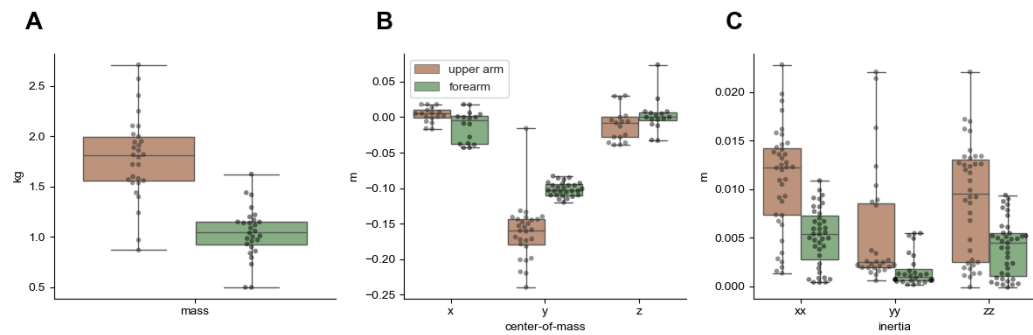

**Figure 4.** The distributions of body parameters are shown. Dots correspond to individual values obtained from previously published studies.

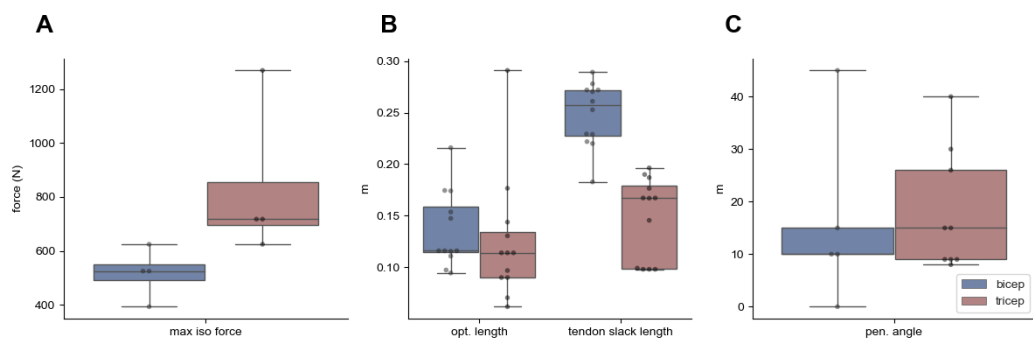

**Figure 5.** The distributions of muscle parameters are shown. Dots correspond to individual values obtained from previously published studies.

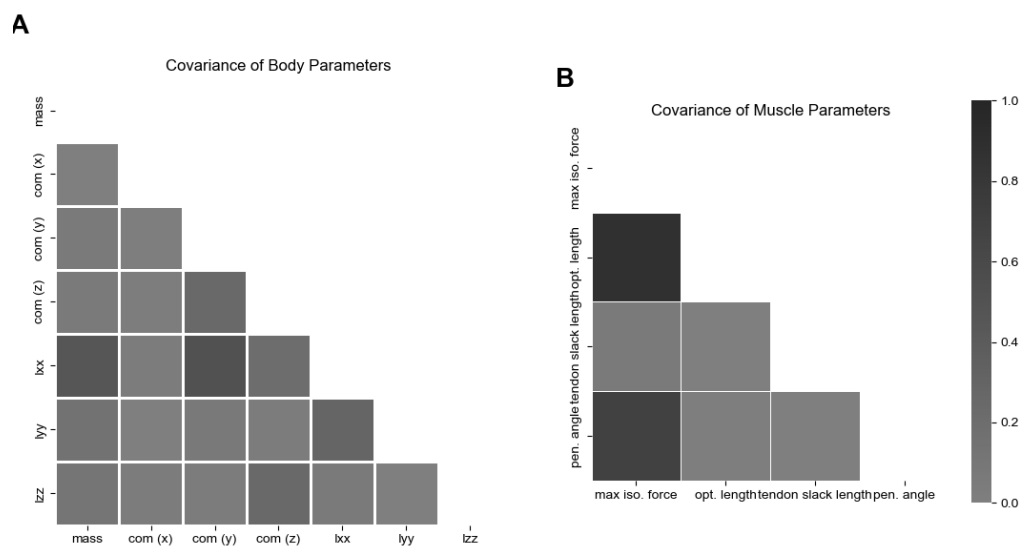

**Figure 6.** Correlation matrices for body (A) and muscle (B) parameters are shown. The color denotes the variance explained,  $r^2$ , for each correlation. The upper diagonal has been removed to avoid redundancy and provide clarity.

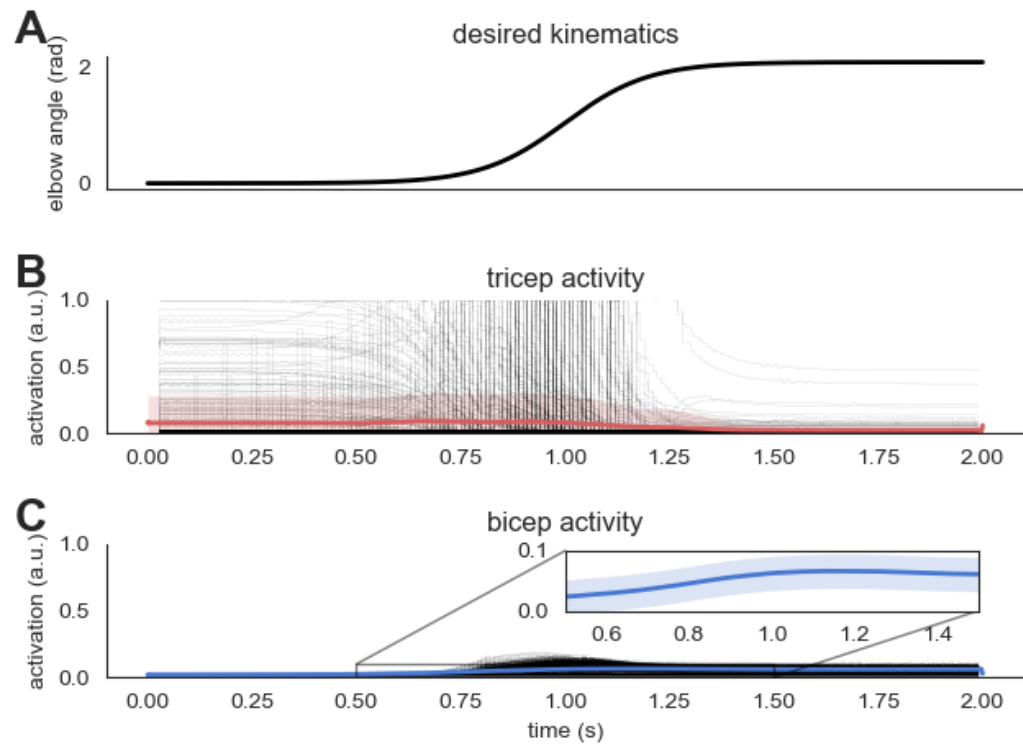

**Figure 7.** Panel A shows the desired kinematics used for the CMC optimization. Panels B and C show the simulated activity of the triceps and biceps muscles, respectively. Black lines denote individual simulation results. The solid red and blue lines show the average activity across all simulations, while the shaded region shows the standard deviation across simulations.

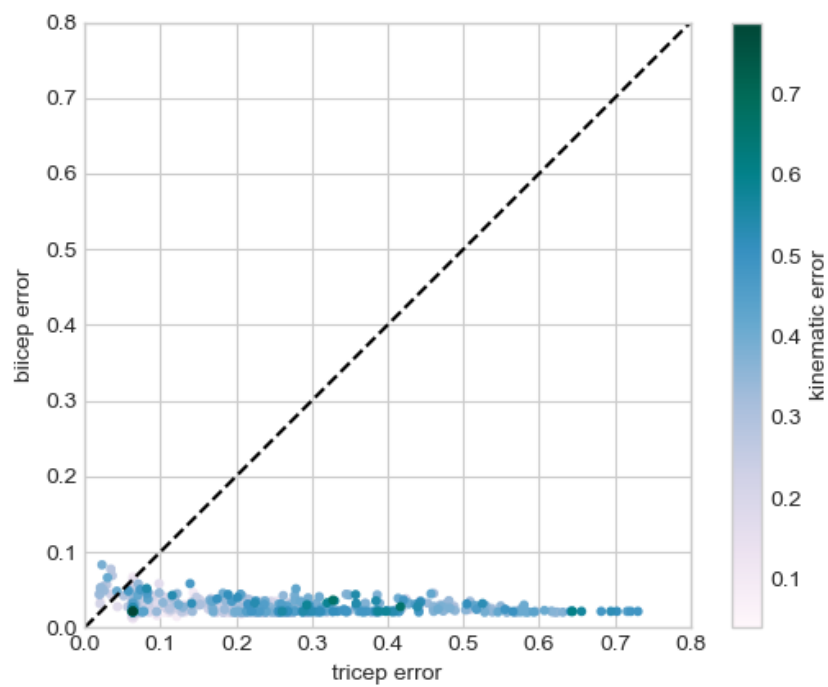

**Figure 8.** Error was calculated for both the triceps and biceps muscle activity. The error was calculated as the RMSE between the original model parameters and the perturbed parameters for each simulation. Each dot denotes an individual simulation and the color corresponds to the kinematic error. The dashed line is the one-to-one line.

## 282 REFERENCES

- 283 Al Borno, M., Vyas, S., Shenoy, K. V., and Delp, S. L. (2020). High-fidelity musculoskeletal modeling  
284 reveals that motor planning variability contributes to the speed-accuracy tradeoff. *eLife*, 9:e57021.
- 285 Amis, A. A., Dowson, D., and Wright, V. (1979). Muscle Strengths and Musculoskeletal Geometry of the  
286 Upper Limb. *Engineering in Medicine*, 8(1):41–48.
- 287 An, K. N., Hui, F. C., Morrey, B. F., Linscheid, R. L., and Chao, E. Y. (1981). Muscles across the elbow  
288 joint: A biomechanical analysis. *Journal of Biomechanics*, 14(10):659–669.
- 289 Bujalski, P., Martins, J., and Stirling, L. (2018). A Monte Carlo analysis of muscle force estimation  
290 sensitivity to muscle-tendon properties using a Hill-based muscle model. *Journal of Biomechanics*,  
291 79:67–77.
- 292 Carbone, V., Fluit, R., Pellikaan, P., van der Krogt, M. M., Janssen, D., Damsgaard, M., Vigneron, L.,  
293 Feilkas, T., Koopman, H. F. J. M., and Verdonshot, N. (2015). TLEM 2.0 – A comprehensive muscu-  
294 loskeletal geometry dataset for subject-specific modeling of lower extremity. *Journal of Biomechanics*,  
295 48(5):734–741.
- 296 Chandler, R., Clauser, C., McConville, J., Reynolds, H., and Young (1975). Investigation of Inertial  
297 Properties of the Human Body. Technical report.
- 298 Correa, T. A., Baker, R., Kerr Graham, H., and Pandy, M. G. (2011). Accuracy of generic musculoskele-  
299 tal models in predicting the functional roles of muscles in human gait. *Journal of Biomechanics*,  
300 44(11):2096–2105.
- 301 Delp, S. L., Anderson, F. C., Arnold, A. S., Loan, P., Habib, A., John, C. T., Guendelman, E., and Thelen,  
302 D. G. (2007). OpenSim: Open-source software to create and analyze dynamic simulations of movement.  
303 *IEEE Trans Biomed Eng*, 54(11):1940–1950.
- 304 Garner, B. A. and Pandy, M. G. (2001). Musculoskeletal Model of the Upper Limb Based on the Visible  
305 Human Male Dataset. *Computer Methods in Biomechanics and Biomedical Engineering*, 4(2):93–126.
- 306 Gritsenko, V., Hardesty, R. L., Boots, M. T., and Yakovenko, S. (2016). Biomechanical constraints  
307 underlying motor primitives derived from the musculoskeletal anatomy of the human arm. *PLoS ONE*,  
308 11(10):1–18.
- 309 Hamed, S., Hosseini Nasab, S. H., Smith, C., Maas, A., Vollenweider, A., Dymke, J., Schütz, P., Damm,  
310 P., Trepczynski, A., and Taylor, W. (2022). Uncertainty in Muscle-Tendon Parameters can Greatly  
311 Influence the Accuracy of Knee Contact Force Estimates of Musculoskeletal Models. *Frontiers in*  
312 *Bioengineering and Biotechnology*, 10.
- 313 Hannah, I., Montefiori, E., Modenese, L., Prinold, J., Viceconti, M., and Mazzà, C. (2017). Sensitivity  
314 of a juvenile subject-specific musculoskeletal model of the ankle joint to the variability of operator-  
315 dependent input. *Proc Inst Mech Eng H*, 231(5):415–422.
- 316 Hardesty, R. L., Boots, M. T., Yakovenko, S., and Gritsenko, V. (2020). Computational evidence for  
317 nonlinear feedforward modulation of fusimotor drive to antagonistic co-contracting muscles. *Scientific*  
318 *Reports*, 10(1):10625.
- 319 Hasson, C. J. and Caldwell, G. E. (2012). Effects of Age on Mechanical Properties of Dorsiflexor and  
320 Plantarflexor Muscles. *Ann Biomed Eng*, 40(5):1088–1101.
- 321 Hicks, J. L., Uchida, T. K., Seth, A., Rajagopal, A., and Delp, S. L. (2015). Is My Model Good Enough?  
322 Best Practices for Verification and Validation of Musculoskeletal Models and Simulations of Movement.  
323 *Journal of Biomechanical Engineering*, 137(2).
- 324 Ho, W.-H., Shiang, T.-Y., Lee, C.-C., and Cheng, S.-Y. (2013). Body Segment Parameters of Young  
325 Chinese Men Determined with Magnetic Resonance Imaging. *Medicine & Science in Sports & Exercise*,  
326 45(9):1759–1766.
- 327 Holzbaur, K. R. S., Murray, W. M., and Delp, S. L. (2005). A model of the upper extremity for simulating  
328 musculoskeletal surgery and analyzing neuromuscular control. *Ann Biomed Eng*, 33(6):829–840.
- 329 Jensen, R. K. (1978). Estimation of the biomechanical properties of three body types using a photogram-  
330 metric method. *Journal of Biomechanics*, 11(8):349–358.
- 331 Jensen, R. K. and Fletcher, P. (1993). Body Segment Moments of Inertia of the Elderly. *Journal of*  
332 *Applied Biomechanics*, 9(4):287–305.
- 333 Koo, K. K. T. (2001). *Neuromusculoskeletal Modeling of the Elbow Joint in Subjects with and without*  
334 *Spasticity*. PhD thesis, Hong Kong Polytechnic University (Hong Kong), Hong Kong.
- 335 Langenderfer, J., Jerabek, S. A., Thangamani, V. B., Kuhn, J. E., and Hughes, R. E. (2004a). Muscu-  
336 loskeletal parameters of muscles crossing the shoulder and elbow and the effect of sarcomere length

- 337 sample size on estimation of optimal muscle length. *Clinical Biomechanics*, 19(7):664–670.
- 338 Langenderfer, J., Jerabek, S. A., Thangamani, V. B., Kuhn, J. E., and Hughes, R. E. (2004b). Muscu-  
339 loskeletal parameters of muscles crossing the shoulder and elbow and the effect of sarcomere length  
340 sample size on estimation of optimal muscle length. *Clinical Biomechanics*, 19(7):664–670.
- 341 Maganaris, C. N. (2001). Force–length characteristics of in vivo human skeletal muscle. *Acta Physiologica*  
342 *Scandinavica*, 172(4):279–285.
- 343 Marra, M. A., Vanheule, V., Fluit, R., Koopman, B. H. F. J. M., Rasmussen, J., Verdonschot, N., and  
344 Andersen, M. S. (2015). A Subject-Specific Musculoskeletal Modeling Framework to Predict In Vivo  
345 Mechanics of Total Knee Arthroplasty. *Journal of Biomechanical Engineering*, 137(2).
- 346 McConville, J. T., Clauser, C. E., Churchill, T. D., Cuzzi, J., and Kaleps, I. (1980). Anthropometric  
347 Relationships of Body and Body Segment Moments of Inertia. Technical report, ANTHROPOLOGY  
348 RESEARCH PROJECT INC YELLOW SPRINGS OH.
- 349 McFarland, D. C., McCain, E. M., Poppo, M. N., and Saul, K. R. (2019). Spatial Dependency of  
350 Glenohumeral Joint Stability During Dynamic Unimanual and Bimanual Pushing and Pulling. *Journal*  
351 *of Biomechanical Engineering*, 141(5).
- 352 Murray, W. M., Buchanan, T. S., and Delp, S. L. (2000). The isometric functional capacity of muscles  
353 that cross the elbow. *Journal of Biomechanics*, 33(8):943–952.
- 354 Myers, C. A., Laz, P. J., Shelburne, K. B., and Davidson, B. S. (2015). A Probabilistic Approach to  
355 Quantify the Impact of Uncertainty Propagation in Musculoskeletal Simulations. *Ann Biomed Eng*,  
356 43(5):1098–1111.
- 357 Nikolova, G. S. (2010). Anthropometric Measurements and Model Evaluation of Mass-Inertial Parameters  
358 of the Human Upper and Lower Extremities. In Bamidis, P. D. and Pallikarakis, N., editors, *XII*  
359 *Mediterranean Conference on Medical and Biological Engineering and Computing 2010*, IFMBE  
360 Proceedings, pages 574–577, Berlin, Heidelberg. Springer.
- 361 Nikolova, G. S. and Toshev, Y. E. (2007). Estimation of male and female body segment parameters  
362 of the Bulgarian population using a 16-segmental mathematical model. *Journal of Biomechanics*,  
363 40(16):3700–3707.
- 364 Nolte, D., Tsang, C. K., Zhang, K. Y., Ding, Z., Kedgley, A. E., and Bull, A. M. J. (2016). Non-linear  
365 scaling of a musculoskeletal model of the lower limb using statistical shape models. *Journal of*  
366 *Biomechanics*, 49(14):3576–3581.
- 367 O’Brien, T. D., Reeves, N. D., Baltzopoulos, V., Jones, D. A., and Maganaris, C. N. (2010). In vivo  
368 measurements of muscle specific tension in adults and children. *Experimental Physiology*, 95(1):202–  
369 210.
- 370 Pal, S., Langenderfer, J. E., Stowe, J. Q., Laz, P. J., Petrella, A. J., and Rullkoetter, P. J. (2007). Probabilistic  
371 Modeling of Knee Muscle Moment Arms: Effects of Methods, Origin–Insertion, and Kinematic  
372 Variability. *Ann Biomed Eng*, 35(9):1632–1642.
- 373 Parkkola, R., Rytökoski, U., and Kormano, M. (1993). Magnetic resonance imaging of the discs and trunk  
374 muscles in patients with chronic low back pain and healthy control subjects. *Spine (Phila Pa 1976)*,  
375 18(7):830–836.
- 376 Peterson, S. L. and Rayan, G. M. (2011). Shoulder and Upper Arm Muscle Architecture. *The Journal of*  
377 *Hand Surgery*, 36(5):881–889.
- 378 R Core Team (2020). *R: A Language and Environment for Statistical Computing*. R Foundation for  
379 Statistical Computing, Vienna, Austria.
- 380 Saltelli, A., Ratto, M., Andres, T., Campolongo, F., Cariboni, J., Gatelli, D.,  
381 Saisana, M., and Tarantola, S. (2008). Global Sensitivity Analysis: The Primer.  
382 <https://publications.jrc.ec.europa.eu/repository/handle/JRC40639>.
- 383 Santos, V. and Valero-Cuevas, F. (2006). Reported anatomical variability naturally leads to multimodal  
384 distributions of Denavit-Hartenberg parameters for the human thumb. *IEEE Transactions on Biomedical*  
385 *Engineering*, 53(2):155–163.
- 386 Sartori, M., Durandau, G., Došen, S., and Farina, D. (2018). Robust simultaneous myoelectric control of  
387 multiple degrees of freedom in wrist-hand prostheses by real-time neuromusculoskeletal modeling. *J.*  
388 *Neural Eng.*, 15(6):066026.
- 389 Saul, K. R., Hu, X., Goehler, C. M., Vidt, M. E., Daly, M., Velisar, A., and Murray, W. M. (2015a).  
390 Benchmarking of dynamic simulation predictions in two software platforms using an upper limb  
391 musculoskeletal model. *Computer Methods in Biomechanics and Biomedical Engineering*, 18(13):1445–



- 1458.
- 392 Saul, K. R., Vidt, M. E., Gold, G. E., and Murray, W. M. (2015b). Upper Limb Strength and Muscle  
393 Volume in Healthy Middle-Aged Adults. *Journal of Applied Biomechanics*, 31(6):484–491.
- 394 Scheys, L., Spaepen, A., Suetens, P., and Jonkers, I. (2008). Calculated moment-arm and muscle-  
395 tendon lengths during gait differ substantially using MR based versus rescaled generic lower-limb  
396 musculoskeletal models. *Gait & Posture*, 28(4):640–648.
- 397 Scott, S. H., Engstrom, C. M., and Loeb, G. E. (1993). Morphometry of human thigh muscles. Determina-  
398 tion of fascicle architecture by magnetic resonance imaging. *J Anat*, 182(Pt 2):249–257.
- 399 Seth, A., Hicks, J. L., Uchida, T. K., Habib, A., Dembia, C. L., Dunne, J. J., Ong, C. F., DeMers,  
400 M. S., Rajagopal, A., Millard, M., Hamner, S. R., Arnold, E. M., Yong, J. R., Lakshmikanth, S. K.,  
401 Sherman, M. A., Ku, J. P., and Delp, S. L. (2018). OpenSim: Simulating musculoskeletal dynamics and  
402 neuromuscular control to study human and animal movement. *PLoS Comput Biol*, 14(7):e1006223.
- 403 Shan, G. and Bohn, C. (2003). Anthropometrical data and coefficients of regression related to gender and  
404 race. *Applied Ergonomics*, 34(4):327–337.
- 405 Thelen, D. G. and Anderson, F. C. (2006). Using computed muscle control to generate forward dynamic  
406 simulations of human walking from experimental data. *Journal of Biomechanics*, 39(6):1107–1115.
- 407 Valente, G., Pitto, L., Testi, D., Seth, A., Delp, S. L., Stagni, R., Viceconti, M., and Taddei, F. (2014).  
408 Are Subject-Specific Musculoskeletal Models Robust to the Uncertainties in Parameter Identification?  
409 *PLOS ONE*, 9(11):e112625.
- 410 Van Rossum, G. and Drake Jr, F. L. (1995). *Python reference manual*. Centrum voor Wiskunde en  
411 Informatica Amsterdam.
- 412 Veeger, H. E. J., Van Der Helm, F. C. T., Van Der Woude, L. H. V., Pronk, G. M., and Rozendal, R. H.  
413 (1991). Inertia and muscle contraction parameters for musculoskeletal modelling of the shoulder  
414 mechanism. *Journal of Biomechanics*, 24(7):615–629.
- 415 Veeger, H. E. J., Yu, B., An, K.-N., and Rozendal, R. H. (1997). Parameters for modeling the upper  
416 extremity. *Journal of Biomechanics*, 30(6):647–652.
- 417 Winter, D. A. (2009). *Biomechanics and Motor Control of Human Movement*. Wiley, fourth edition.
- 418 Winters, J. M. and Stark, L. (1988). Estimated mechanical properties of synergistic muscles involved in  
419 movements of a variety of human joints. *Journal of Biomechanics*, 21(12):1027–1041.
- 420 Young, J. W., Chandler, R. F., Snow, C. C., Robinette, K. M., Zehner, G. F., Loftberg, M. S., and Civil  
421 Aeromedical Institute (1983). Anthropometric and mass distribution characteristics of the adult female.  
422 Technical Report FAA-AM-83-16.
- 423
